# Supplementary material for: A robust and biodegradable hydroxyapatite/poly(lactide-co-ε-caprolactone) electrospun membrane for dura repair
Source: Royal Society of Chemistry journal article supplement (doi:10.1039/d4tb00863d), 2024-01-01
Supplement: d4tb00863d1.pdf [file d4tb00863d1.pdf]

## Supporting information

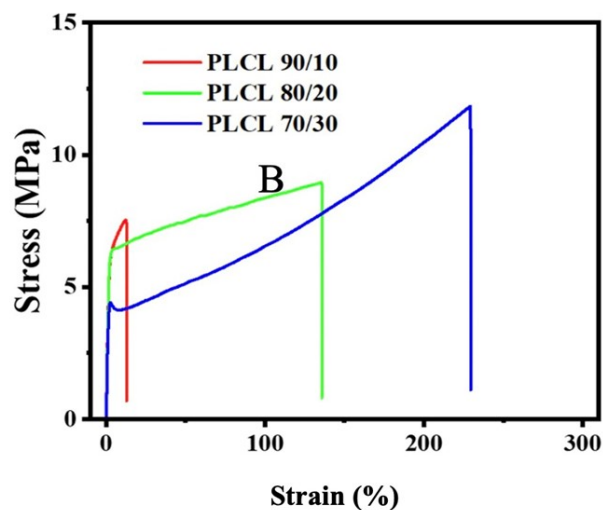

**Figure S1:** Stress-strain curves of PLCL 90/10, PLCL 80/20 and PLCL 70/30 electrospun membranes.

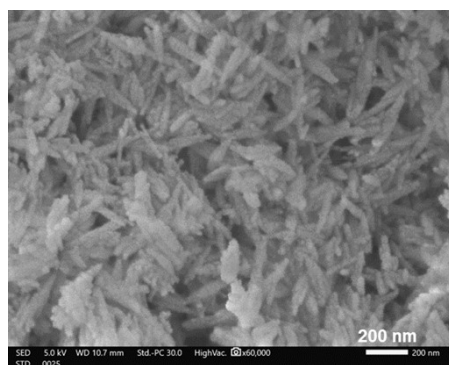

**Figure S2.** SEM images of the nHA used for preparing nHA/PLCL membrane for dura repair.

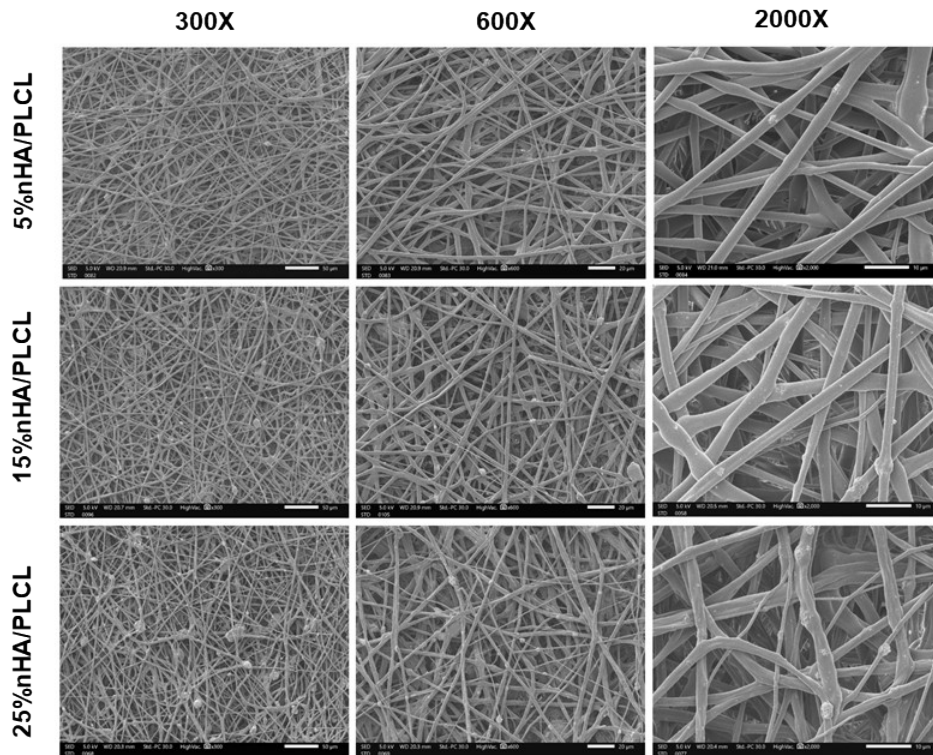

**Figure S3:** SEM images of nHA/PLCL electrospun membranes with varying nHA content.

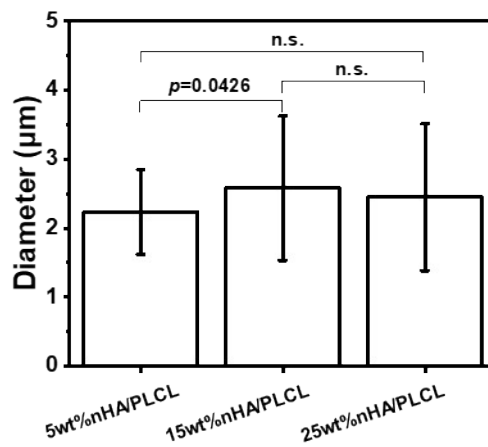

**Figure S4:** Calculation of nHA/PLCL electrospun membranes' fiber diameter according to SEM images.

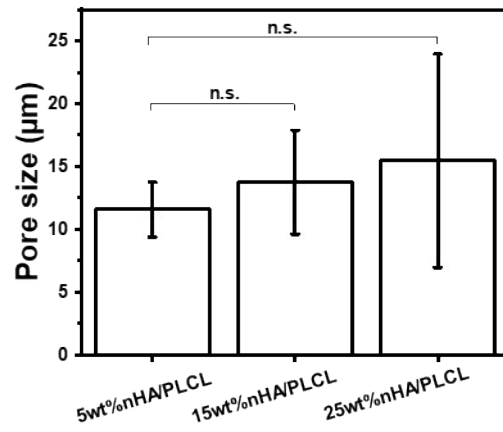

**Figure S5:** Calculation of nHA/PLCL electrospun membranes' pore size according to SEM images.

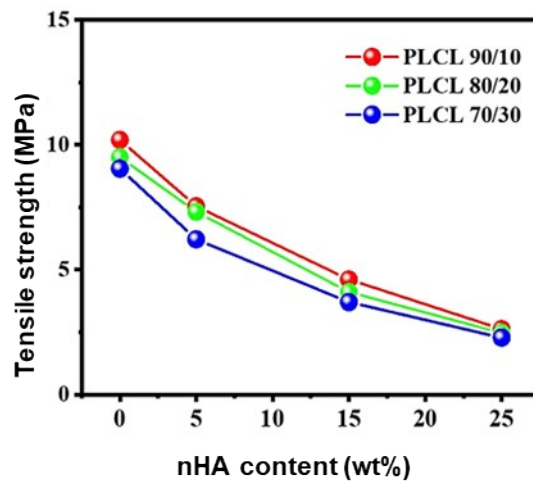

**Figure S6:** Tensile strength of nHA/PLCL membranes.

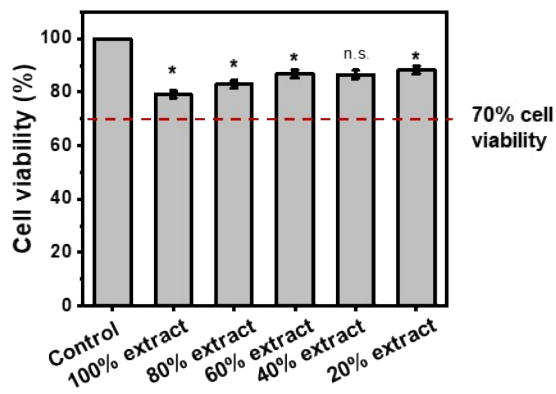

**Figure S7:** Cell viability calculation after 15%wt nHA/PLCL membrane extract treatment.

**Table S1** Quantification of inflammatory cell number in cerebrospinal fluid at 1, 2, 3 months. ( n=3; vs Control, P\*\*\*<0.001 )

| <b>Implantation time</b> | <b>Group</b> | <b>Neutrophil cell count</b> | <b>Eosinophils cell count</b> | <b>Basophilic granulocyte count</b> | <b>Lymphocyte count</b> | <b>Macrophage count</b>  | <b>Total inflammatory cell count</b> |
|--------------------------|--------------|------------------------------|-------------------------------|-------------------------------------|-------------------------|--------------------------|--------------------------------------|
| <b>1 month</b>           | Control      | 0.00±0.00                    | 0.00±0.00                     | 0.00±0.00                           | 0.40±0.55               | 0.00±0.00                | 0.40±0.55                            |
|                          | Commercial   | 0.00±0.00                    | 0.00±0.00                     | 0.00±0.00                           | 0.60±1.34               | 0.00±0.00                | 0.60±1.34                            |
|                          | nHA/PLCL     | 0.00±0.00                    | 0.00±0.00                     | 0.00±0.00                           | 0.60±1.34               | 0.00±0.00                | 0.60±1.34                            |
| <b>2 months</b>          | Control      | 0.00±0.00                    | 0.20±0.45                     | 106.60±98.30                        | 7.80±13.59              | 5.60±5.37                | 120.20±109.27                        |
|                          | Commercial   | 0.00±0.00                    | 0.00±0.00                     | 0.20±0.45 <sup>***</sup>            | 0.60±1.34               | 0.00±0.00 <sup>***</sup> | 1.00±1.22 <sup>***</sup>             |
|                          | nHA/PLCL     | 0.00±0.00                    | 0.00±0.00                     | 0.20±0.45 <sup>***</sup>            | 0.40±0.89               | 0.00±0.00 <sup>***</sup> | 0.60±0.89 <sup>***</sup>             |
| <b>3 months</b>          | Control      | 0.00±0.00                    | 0.00±0.00                     | 95.50±110.52                        | 0.00±0.00               | 4.50±9.00                | 100.00±115.47                        |
|                          | Commercial   | 0.00±0.00                    | 0.00±0.00                     | 0.60±0.89                           | 0.00±0.00               | 0.00±0.00                | 0.60±0.89                            |

---

|          |           |           |           |           |           |           |
|----------|-----------|-----------|-----------|-----------|-----------|-----------|
| nHA/PLCL | 0.00±0.00 | 0.00±0.00 | 0.00±0.00 | 0.00±0.00 | 0.00±0.00 | 0.00±0.00 |
|----------|-----------|-----------|-----------|-----------|-----------|-----------|

---
